# Supplementary material
Source: Springer Nature journal article supplement (https://www.springermedizin.de/resource/supplementary/12943_2014_1384_MOESM4_ESM.pdf/9552844)

**A**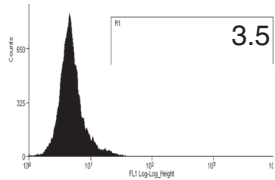**2<sup>nd</sup>-Ab-FITC**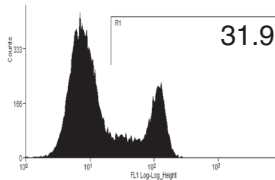**Medium control**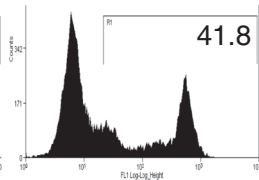**T-Ag****HMGN2-FITC****B**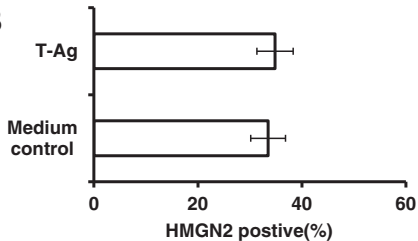**C**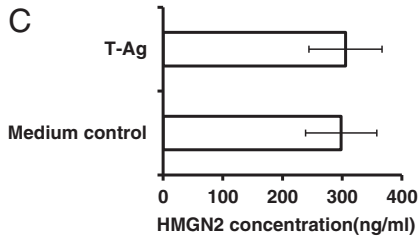

Supplement: MOESM4 [file 9552844]
